# Supplementary material for: Vaccine adjuvant platform and fluorescence imaging of amphiphilic γ-PGA-IMQ-LA-FL conjugates
Source: Royal Society of Chemistry journal article supplement (doi:10.1039/d1ma01169c), 2022-01-01
Supplement: d1ma01169c1.pdf [file d1ma01169c1.pdf]

## Electronic Supplementary Information (ESI)

### Vaccine adjuvant Platform and Fluorescence Imaging of Amphiphilic $\gamma$ -PGA-IMQ-LA-FL Conjugates

Wenzhu Yin <sup>a,c</sup>, Dechun Xuan <sup>b</sup>, Bihua Deng <sup>a</sup>, Mingxu Zhou <sup>a</sup>, Fang Ma <sup>a</sup>, Jinqiu Zhang <sup>\*a,b</sup> and Yu Lu <sup>\*a,b,c</sup>

<sup>a</sup> Institute of Veterinary Immunology & Engineering, National Research Center of Engineering and Technology for Veterinary Biologicals, Jiangsu Key Laboratory for Food Quality and Safety-State Key Laboratory Cultivation Base, Ministry of Science and Technology, Jiangsu Academy of Agricultural Sciences, Nanjing 210014, China.

<sup>b</sup> School of pharmacy, Jiangsu University, Zhenjiang 212013, China.

<sup>c</sup> Jiangsu Co-innovation Center for Prevention and Control of Important Animal Infectious and Zoonoses, Yangzhou, 225009, China.

#### Single <sup>1</sup>H NMR full spectra of FIP and other materials

(a)

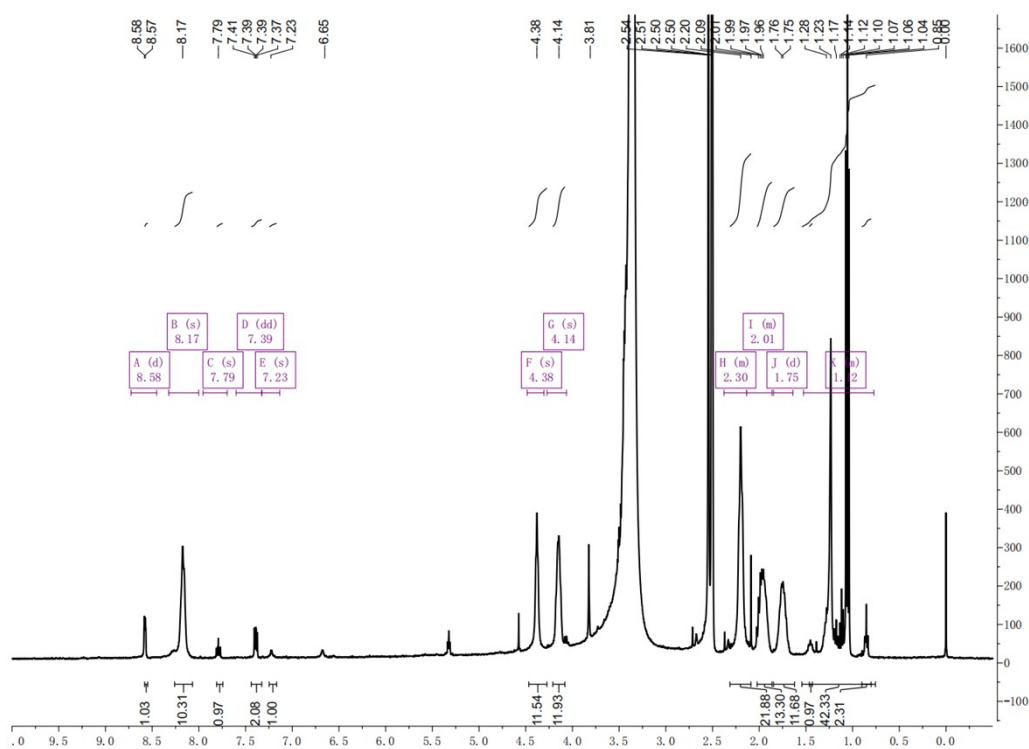

(b)

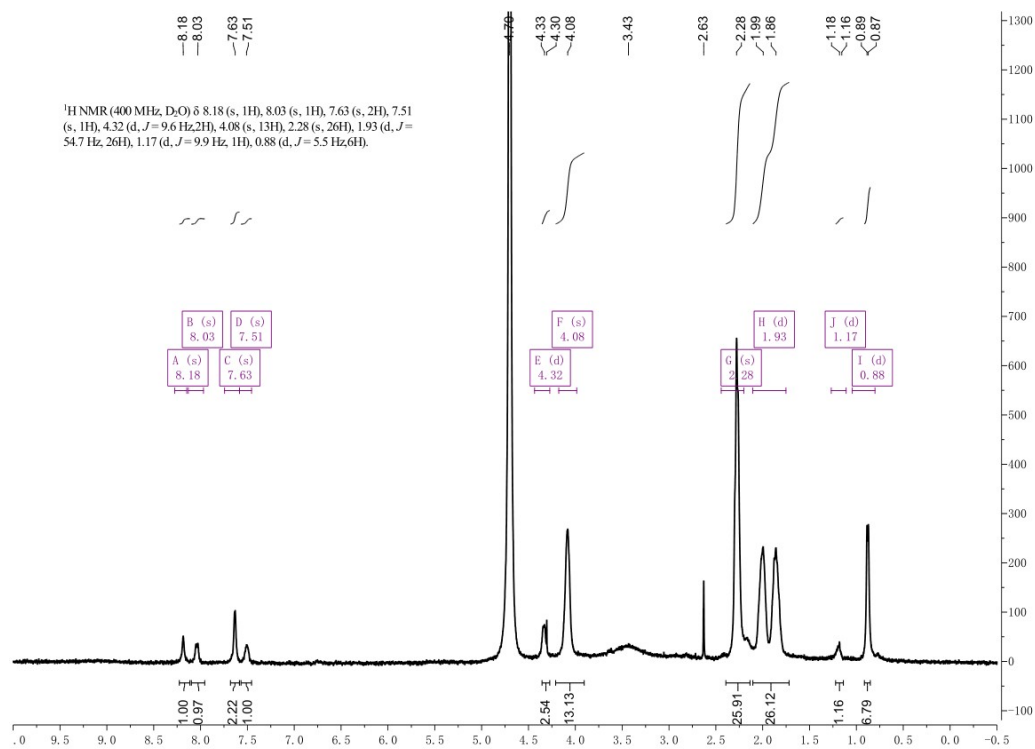

(c)

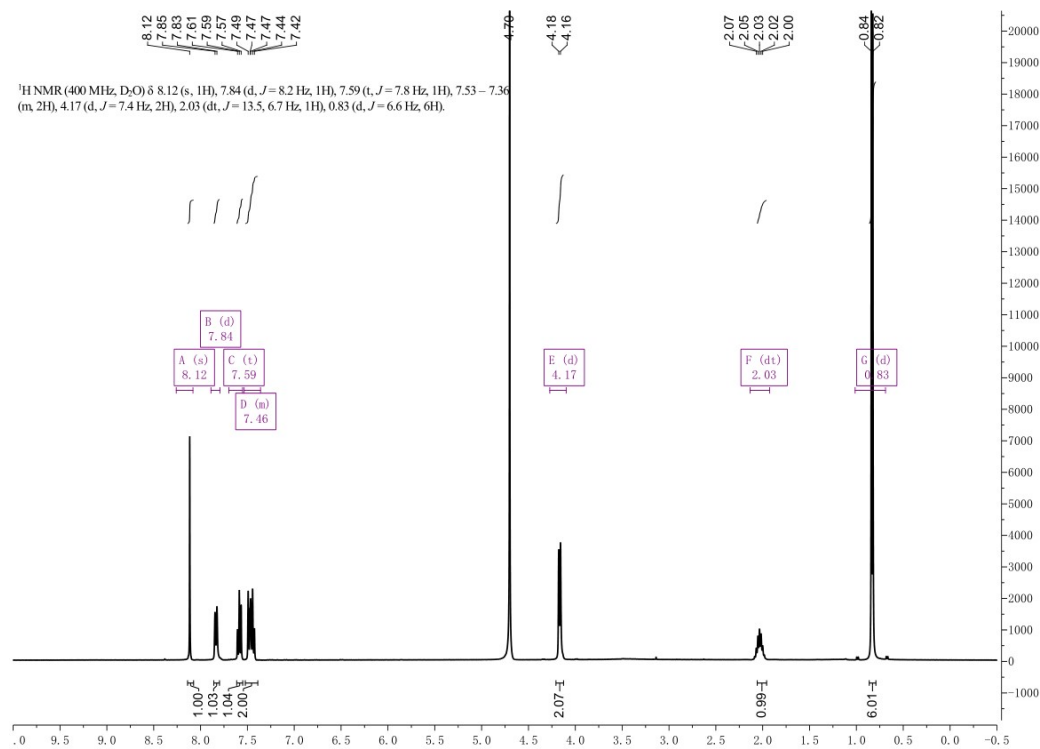

(d)

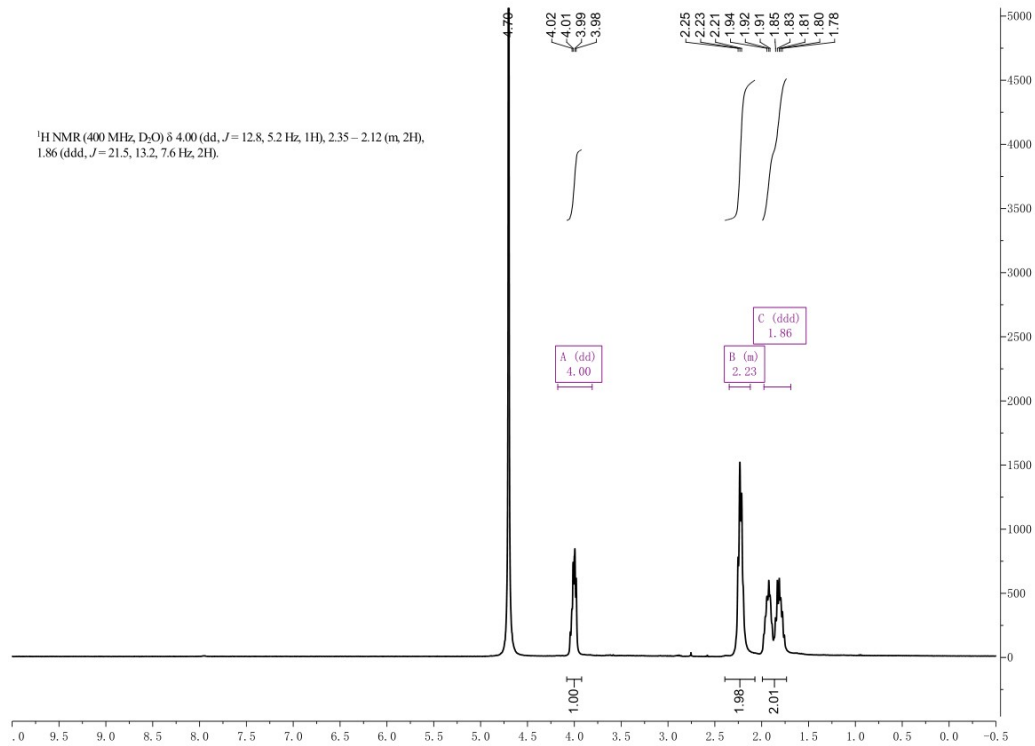

Figure S1. The  $^1\text{H}$  NMR full spectra of (a) FIP, (b)  $\gamma$ -PGA-IMQ, (c) IMQ and (d)  $\gamma$ -PGA

## DLS and PDI information of FIP

|                                | Size (d.nm):         | % Intensity: | St Dev (d.nm): |
|--------------------------------|----------------------|--------------|----------------|
| <b>Z-Average (d.nm):</b> 284.7 | <b>Peak 1:</b> 354.3 | 97.4         | 203.5          |
| <b>Pdl:</b> 0.265              | <b>Peak 2:</b> 4831  | 2.6          | 712.1          |
| <b>Intercept:</b> 0.941        | <b>Peak 3:</b> 0.000 | 0.0          | 0.000          |
| <b>Result quality :</b> Good   |                      |              |                |

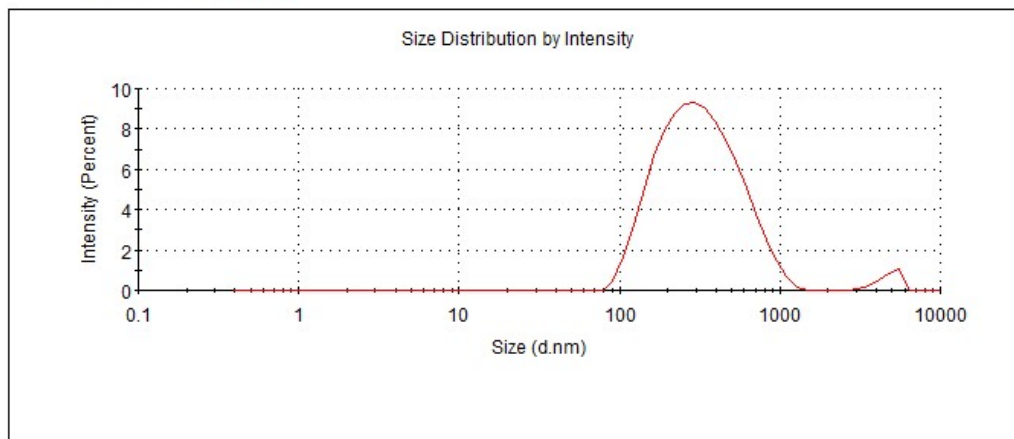

Figure S2. the average diameter of FIP was detected by DLS

## FI-IR spectra of FIP and $\gamma$ -PGA-LA

(a)

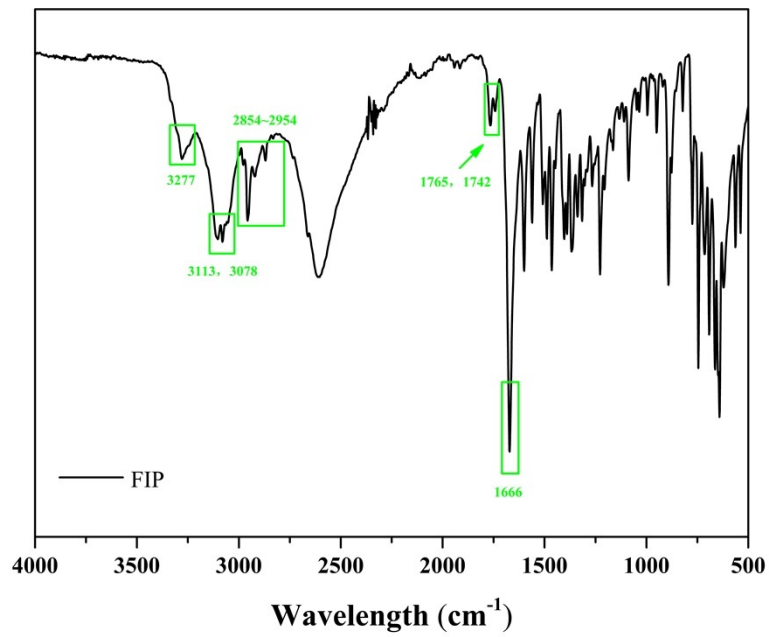

(b)

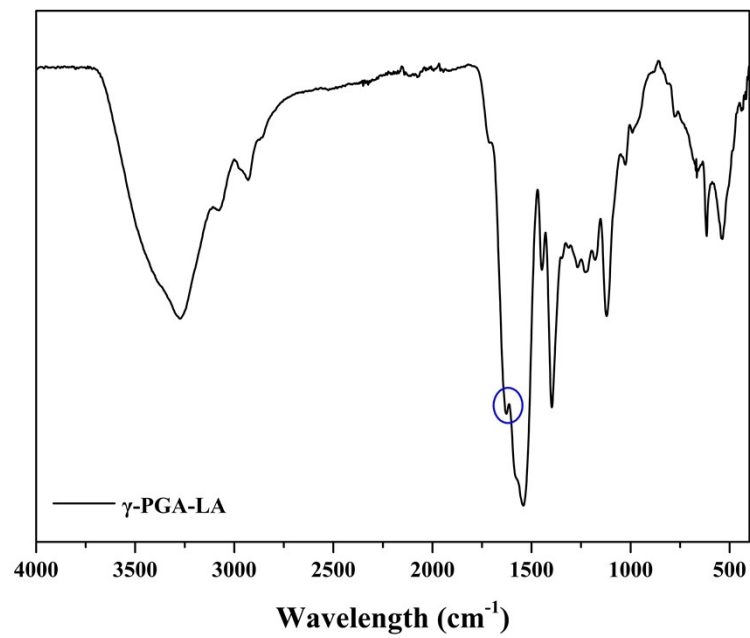

Figure S3. the FT-IR images of (a) FIP and (b)  $\gamma$ -PGA-LA

## Cytokines Detection

To further evaluate the effect of FIP on RAW 264.7 activation, the concentration of cytokines in supernatants of RAW 264.7 stimulated with OVA, OVA+FIP was measured by ELISA kits.

RAW 264.7 cells were first cultured in DMEM supplemented with 10% fetal bovine serum, then diluted to the final cell concentration of  $2 \times 10^5$  cells/mL, transferred to 24-well plants at 200  $\mu$ L per well, and cultured at 37 °C for 24 h. After discarding the supernatant in the wells, 200  $\mu$ L of OVA+FIP, OVA (diluted in DMEM culture) were added into the wells, followed by incubation at 37 °C for 24 h. Finally, The amounts of the inflammatory cytokines (IL-2, 4, 6) and macrophage activating factor (IFN- $\gamma$ ) in the cell culture supernatants were determined by ELISA (Figure S1). All data demonstrated that the production of IL-2, 4, 6 and IFN- $\gamma$  were significantly improved after OVA+FIP treatment. Activation of RAW 264.7 cells by FIP can induce RAW 264.7 cells maturation and stimulate the expression of pro-inflammatory cytokines. The performance of FIP are favorable for vaccine adjuvant and subsequent adaptive immune responses. [1].

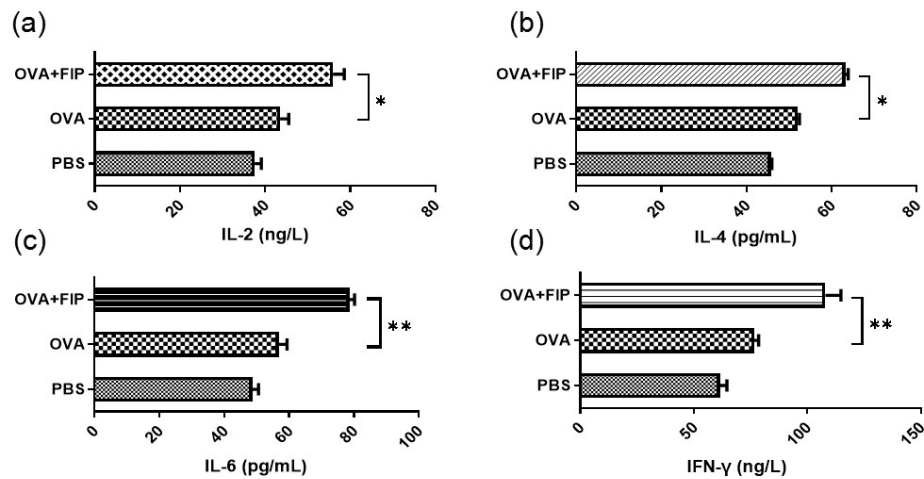

Figure S4. The secretion of cytokines by RAW264.7 cells stimulated with OVA, OVA+FIP or PBS. (a) IL-2, (b) IL-4, (c) IL-6 and (d) IFN- $\gamma$

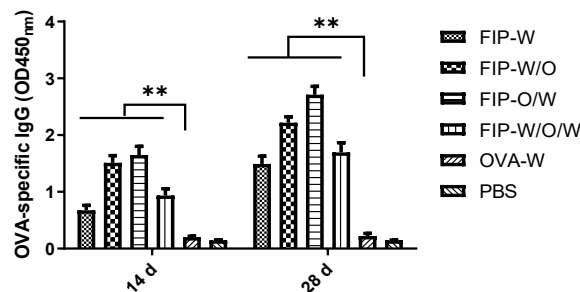

Figure S5. the OVA-special IgG of mice immunized OVA+FIP with different formulations at 14 and 28 dpv

## References

- [1] J. P. Vasilakos, M. ATomai, *Vaccines*, 2013, **12** (7), 809-819.
